# Supplementary material
Source: PubMed Central journal article supplement (PMC4477838)
Supplement: NIHMS696621-supplement-Supplemental.pdf [file NIHMS696621-supplement-Supplemental.pdf]

## Supplemental information

<sup>1\*</sup> Trained interviewers contacted eligible respondents to arrange an in-person interview. For a full description of interview eligibility criteria. Respondents were eligible for interviews if they: (a) self-identified as male or female and were assigned that sex at birth; (b) self-identified as LGB or heterosexual; (c) self-identified as White, Black, or Latino; (d) were between the ages of 18 and 59; (e) lived in New York City for two years or more; and (f) were able to engage in conversational English. While respondents had to identify themselves as heterosexual or LGB and White, Black, or Latino, it was not required that they have a strong identification with any of these groups, nor did they have to use these terms in how they described themselves. Respondents used a variety of identity terms, including *African American*, *Hispanic*, *straight*, *queer*, and *woman-loving-woman*. For brevity and clarity, this paper uses only *White*, *Black*, *Latino*, *LGB*, and *heterosexual*. The requirement for 2-year residence was intended to minimize sampling bias related to immigration. That is, recent immigrants are more likely to experience stressors related to migration, and they may not have had opportunities to form social ties and connect with resources.

---

<sup>2\*\*</sup> The Life Events Questionnaire (LEQ; Meyer et al., 2006) is a semi-structured interview designed by Project Stride to elicit information about 47 stressful events experienced throughout the life-span, including recent life events (Kman, Palmetto, & Frost, 2006). The LEQ classifies events according to eight categories: extreme events, financial events, health-related events including child-birth, events related to family and

friends, crime-related events, events relating to physical and sexual violence, childhood events, and other events.
